# Supplementary material
Source: Royal Society of Chemistry journal article supplement (doi:10.1039/d6ay00422a)
Supplement: d6ay00422a1.pdf [file d6ay00422a1.pdf]

# Phosphate-Mediated Fluorescence Switching in a UiO-66-NH<sub>2</sub>/Red Carbon Dot Hybrid for Ratiometric and Smartphone-Assisted Visual Detection of Ethephon

Xiao Hu<sup>a#</sup>, Rui Pan<sup>b#</sup>, Shufei Huang<sup>a</sup>, Yifan Lin<sup>b</sup>, Meizhu Xu<sup>c</sup>, Caiping Yang<sup>d</sup>,  
Lishuang Yu<sup>a</sup>, Qiang Zou<sup>c</sup>, Huifeng Xu<sup>b\*</sup>

a Fujian University Key Laboratory for Research and Development of TCM Resource, College of Pharmacy, Fujian University of Traditional Chinese Medicine, Fuzhou, Fujian 350122, P.R. China

b Key Laboratory of Integrative Medicine of Fujian Province University, Academy of Integrative Medicine, College of Integrative Medicine, Fujian University of Traditional Chinese Medicine, Fuzhou, Fujian, P. R. China. E-mail:

xuhf@fjtcn.edu.cn

c Comprehensive Technology Service Center of Quanzhou Customs, Quanzhou, Fujian 362000, P.R. China

d Longyan Product Quality Inspection Institute, Longyan, Fujian 364000, China

# These authors contributed equally to this work.

Figure S1

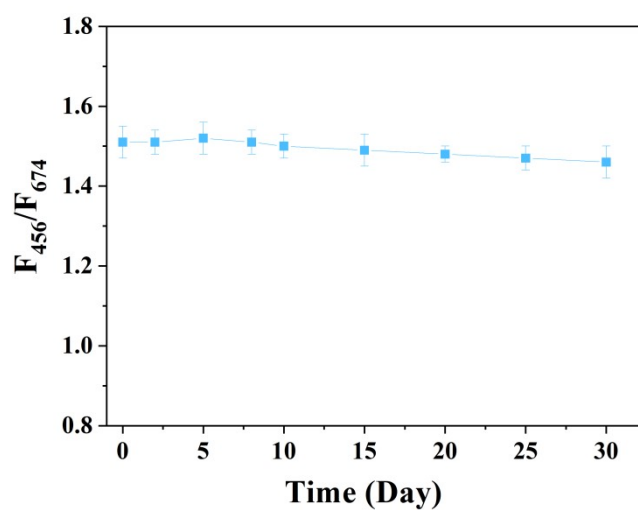

Figure S1 The stability of R-CDs/UiO-66-NH<sub>2</sub>

Figure S2

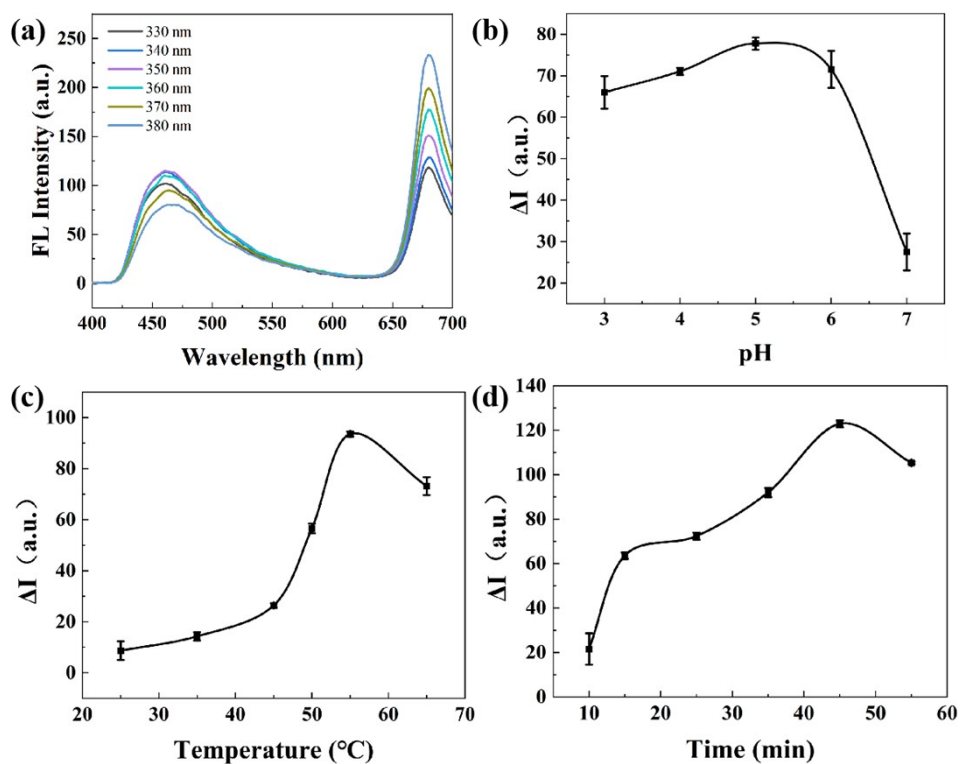

Figure S2 Optimization of the reaction conditions for the interaction between R-CDs/UiO-66-NH<sub>2</sub> and ETH. (a) Excitation wavelength, (b) pH, (c) Temperature, (d) Time. (n=3)

**Table S1** Individual linear calibration equations and intra-device reproducibility for different smartphones

| Smartphones | Linear Equation        | LOD ( $\mu\text{M}$ ) | RSD (%)   |
|-------------|------------------------|-----------------------|-----------|
| Xiaomi 14   | $-1.442x + 0.978$      | 23.1                  | 1.2- 4.4  |
| Rongyao X60 | $y = -1.650 x + 0.952$ | 18.0                  | 1.07-5.06 |

**Table S2** Intra-day and inter-day variability of R-CDs/UiO-66-NH<sub>2</sub> in detecting ETH

|                            | Concentration<br>( $\mu\text{M}$ ) | $F_{456}/F_{674}$ |      |      | RSD (%) |
|----------------------------|------------------------------------|-------------------|------|------|---------|
|                            |                                    | 1                 | 2    | 3    |         |
| Intra-daily<br>Variability | 0                                  | 0.42              | 0.39 | 0.42 | 3.97    |
|                            | 12.5                               | 0.54              | 0.53 | 0.55 | 1.37    |
|                            | 37.5                               | 0.72              | 0.61 | 0.63 | 8.56    |
| Inter-daily<br>Variability | 0                                  | 0.42              | 0.47 | 0.42 | 5.98    |
|                            | 12.5                               | 0.54              | 0.50 | 0.50 | 4.40    |
|                            | 37.5                               | 0.61              | 0.60 | 0.60 | 1.19    |
